# Supplementary material for: Positive nodal status is still a risk factor for long-term survivors of non-small cell lung cancer 5 years after complete resection
Source: PubMed Central journal article supplement — J Thorac Dis. 2021 Oct;13(10):5826–34. doi: 10.21037/jtd-21-854 (PMC8575849; doi:10.21037/jtd-21-854), 2021-10
Supplement: jtd-13-10-5826-dss.pdf [file jtd-13-10-5826-dss.pdf]

## Data Sharing Statement

|                     |                                                                                                                                                    |                                                                                                                                                 |
|---------------------|----------------------------------------------------------------------------------------------------------------------------------------------------|-------------------------------------------------------------------------------------------------------------------------------------------------|
| <b>Article Info</b> | <a href="https://dx.doi.org/10.21037/jtd-21-854">https://dx.doi.org/10.21037/jtd-21-854</a>                                                        |                                                                                                                                                 |
| <b>Item</b>         | <b>Question</b>                                                                                                                                    | <b>Authors' Response<br/>(place "-" if not applicable)</b>                                                                                      |
| 1                   | Would you like to share data collected for your study to others?                                                                                   | Yes                                                                                                                                             |
| 2                   | If not, would you like to share the reason for your decision?                                                                                      | -                                                                                                                                               |
| 3                   | What data in particular will be shared?                                                                                                            | Clinicopathological information and follow-up information.                                                                                      |
| 4                   | Any other documents will be share? Such as study protocol, statistical analysis plan, informed consent form, clinical study report, analytic code. | No                                                                                                                                              |
| 5                   | When will data availability begin?                                                                                                                 | From the publication date.                                                                                                                      |
| 6                   | When will data availability end?                                                                                                                   | Two years within the publication date.                                                                                                          |
| 7                   | To whom will you share the data?                                                                                                                   | Thoracic surgeon and oncology surgeon who are interested in this study.                                                                         |
| 8                   | For what type of analysis or purpose?                                                                                                              | For analysis to evaluate the role of N1 station in the long-term survivals of NSCLC.                                                            |
| 9                   | How or where can the data/documents be obtained?                                                                                                   | All data requests should be submitted to the corresponding author for consideration. Access to anonymized data may be granted following review. |
| 10                  | Any other restrictions?                                                                                                                            | No                                                                                                                                              |
